# Supplementary material for: Assessment of Heavy Metal Uptake in Potatoes Cultivated in a Typical Karst Landform, Weining County, China
Source: MDPI journal article supplement (doi:10.3390/foods11152379), 2022-08-08
Supplement: s1 [file s1]

## **SUPPORTTING INFORMATION**

### **Assessment of heavy metal uptake in potato cultivated in a typical karst landform, Weining county, China**

**Xueqin Shi <sup>1</sup>, Qiao Lin<sup>1</sup>, Pengyu Deng<sup>1</sup>, Tianyou Feng <sup>1</sup>, Yuping Zhang<sup>1\*</sup>**

<sup>1</sup>State Key Laboratory Breeding Base of Green Pesticide and Agricultural Bioengineering, Key Laboratory of Green Pesticide and Agricultural Bioengineering, Ministry of Education, Guizhou University, Guiyang 550025, P. R. China.

\* Correspondence: zhangyupinggz@163.com; Tel.: (+86)851 88292090

**Table S1:** Heavy metal content in soil in different agricultural regions (mg kg<sup>-1</sup>)

| Region                             | Metals | Cu           | Cr           | Zn           | As         | Pb           | Ni          | References                         |
|------------------------------------|--------|--------------|--------------|--------------|------------|--------------|-------------|------------------------------------|
| Weining, Guizhou, China            | Mean   | 47.8         | 119          | 175.01       | 25.8       | 59.3         | 50.8        | In this study                      |
|                                    | Range  | 18.92-131.35 | 62.05-292.04 | 22.94-468.55 | 9.74-62.83 | 19.96-115.46 | 24.89-97.15 |                                    |
| Trikala, Greece                    | Mean   | 0.925        | 0.018        | 9.87         | -          | 0.051        | 0.024       | Golia et al, 2008 <sup>1</sup>     |
|                                    | Range  | -            | -            | -            | -          | -            | -           |                                    |
| Netherlands                        | Mean   | -            | -            | -            | 12         | 31           | -           | Wiersma et al, 1986 <sup>11</sup>  |
|                                    | Range  | -            | -            | -            | 0.1-110    | 0-460        | -           |                                    |
| Yangzhong District, Jiangsu, China | Mean   | 32.1         | 80.9         | 79.4         | 12.0       | 26.7         | 33.4        | Huang et al, 2007 <sup>12</sup>    |
|                                    | Range  | 24.9-40.2    | 74.1-90.4    | 62.8-101     | 9.2-14.3   | 19.9-35.7    | 29.3-45.1   |                                    |
| Hamadan, Iran                      | Mean   | 26.7         | 40.1         | 55.6         | 8.6        | 10.4         | 32.9        | Mehrddad et al, 2013 <sup>13</sup> |
|                                    | Range  | 1.46-50.11   | 18.2-53.8    | 0.64-139.4   | 2.4-17.03  | 0.55-30.1    | 0.35-54.9   |                                    |
| Four regions in Zhejiang, China    | Mean   | -            | -            | -            | -          | -            | -           | Wang et al, 2020 <sup>14</sup>     |
|                                    | Range  | 27.0-83.4    | 47.1-91.2    | 120.8-359.0  | 6.44-17.64 | 32.6-216.4   | 19.0-48.7   |                                    |
| Guigang, Guangxi, China            | Mean   | 24.45        | 61.12        | 66.42        | 20.31      | 22.67        | 44.14       | Shan et al, 2020 <sup>15</sup>     |
|                                    | Range  | 4.89-52.11   | 6.91-105.12  | 27.87-122.80 | 3.11-39.43 | 0.45-61.17   | 13.55-98.44 |                                    |
| Turpan Basin, China                | Mean   | -            | 59.00        | -            | 9.57       | 13.41        | 21.60       | Marhaba et al, 2021 <sup>16</sup>  |
|                                    | Range  | -            | 47.30-74.10  | -            | 6.86-13.41 | 8.34-25.40   | 16.10-28.50 |                                    |

<sup>1</sup> Golia, E. E.; Dimirkou, A.; Mitsios, I. K. Influence of some soil parameters on heavy metals accumulation by vegetables grown in agricultural soils of different soil orders. *Bull Environ Contam Toxicol.* **2008**, *81*(1), 80-84.

<sup>11</sup> Wiersma, D.; Berend, J.; Nicolaas, G. Cadmium, lead, mercury, and arsenic concentrations in crops and corresponding soils in the Netherlands. *J Agric Food Chem.* **1986**, *34*, 1067-1074.

<sup>12</sup> Huang, S. S.; Liao, Q. L.; Hua, M.; Wu, X. M.; Bi, K. S.; Yan, C. Y.; Chen, B.; Zhang, X. Y. Survey of heavy metal pollution and assessment of agricultural soil in Yangzhong district, Jiangsu province, China. *Chemosphere.* **2007**, *67*(11), 2148-2155.

<sup>13</sup> Mehrddad, L. Bahareh, M. Hajar et al. Heavy metal risk assessment for potatoes grown in overused phosphate-fertilized soils. *Environ Monit Assess.* **2013**, *185*(2),

1825-1831.

<sup>14</sup> Wang, Y. L.; Ji, T. W.; Yu, D. H.; Xiao, M. Investigation on heavy metal contents in soils and vegetables of some vegetable bases in zhejiang province. *J Zhejiang Agric Sci.* **2020**, 61(07), 1310-1312.

<sup>15</sup> Shan, Z. Q.; Shi, S. M.; Ma, R. K.; Yang, X. L. Soil heavy metals pollution and ecological risk assessment in citrus production areas of Guigang, Guangxi province. *Sichuan Environ.* **2020**, 39(04), 136-141.

<sup>16</sup> Marhaba, T.; Mamattursun, E.; Wang, W. W. Heavy metal contamination and potential ecological risk of vineyard soil in Turpan Basin. *Environ Monit Chin.* **2021**, 37(01), 112-119.

**Table S2:** The environment parameters and moisture content in potato

| Sample no | pH   | OM    | Elevation (m) | Moisture content (%) |
|-----------|------|-------|---------------|----------------------|
| 1         | 5.45 | 23.1  | 2196          | 0.806                |
| 2         | 6.68 | 43.3  | 2199          | 0.808                |
| 3         | 7.29 | 43.5  | 2172          | 0.815                |
| 4         | 5.71 | 30.1  | 2187          | 0.838                |
| 5         | 5.26 | 71.3  | 2324          | 0.806                |
| 6         | 5.74 | 75.9  | 2546          | 0.810                |
| 7         | 5.22 | 57.8  | 2728          | 0.819                |
| 8         | 5.55 | 82.1  | 2608          | 0.828                |
| 9         | 7.34 | 20.8  | 2379          | 0.826                |
| 10        | 4.9  | 12.3  | 2474          | 0.805                |
| 11        | 5.38 | 48.5  | 2534          | 0.840                |
| 12        | 5.94 | 63.2  | 2314          | 0.805                |
| 13        | 6.33 | 78.0  | 2404          | 0.816                |
| 14        | 5.97 | 47.9  | 2377          | 0.807                |
| 15        | 5.90 | 68.2  | 2312          | 0.794                |
| 16        | 5.42 | 29.2  | 2195          | 0.810                |
| 17        | 6.36 | 61.8  | 2324          | 0.795                |
| 18        | 4.88 | 64.8  | 2291          | 0.783                |
| 19        | 4.90 | 53.6  | 2336          | 0.813                |
| 20        | 6.60 | 76.5  | 2313          | 0.801                |
| 21        | 5.45 | 68.4  | 2301          | 0.790                |
| 22        | 5.05 | 86.0  | 2437          | 0.807                |
| 23        | 6.54 | 56.6  | 2456          | 0.813                |
| 24        | 4.36 | 82.7  | 2383          | 0.838                |
| 25        | 7.95 | 52.0  | 2360          | 0.796                |
| 26        | 5.93 | 68.3  | 2331          | 0.805                |
| 27        | 8.22 | 23.0  | 2174          | 0.800                |
| 28        | 5.32 | 45.6  | 2182          | 0.803                |
| 29        | 7.31 | 50.7  | 2226          | 0.806                |
| 30        | 4.75 | 49.2  | 2151          | 0.785                |
| 31        | 4.59 | 39.9  | 2240          | 0.817                |
| 32        | 4.56 | 77.8  | 2255          | 0.820                |
| 33        | 5.95 | 75.8  | 2352          | 0.821                |
| 34        | 5.00 | 59.3  | 2410          | 0.832                |
| 35        | 5.58 | 86.1  | 2534          | 0.850                |
| 36        | 5.44 | 101.9 | 2520          | 0.822                |
| 37        | 4.64 | 25.0  | 2332          | 0.806                |
| 38        | 4.64 | 39.5  | 2180          | 0.805                |
| 39        | 4.58 | 34.1  | 2184          | 0.818                |
| 40        | 5.12 | 42.1  | 2325          | 0.813                |

|    |      |      |      |       |
|----|------|------|------|-------|
| 41 | 6.10 | 30.7 | 2583 | 0.818 |
| 42 | 5.49 | 61.3 | 2744 | 0.817 |
| 43 | 5.40 | 28.8 | 2658 | 0.802 |
| 44 | 5.50 | 38.1 | 2572 | 0.818 |
| 45 | 8.41 | 29.2 | 2371 | 0.790 |
| 46 | 5.12 | 30.2 | 2236 | 0.822 |
| 47 | 8.10 | 54.7 | 2290 | 0.779 |
| 48 | 5.02 | 35.7 | 2258 | 0.783 |
| 49 | 4.74 | 29.4 | 2291 | 0.821 |
| 50 | 4.58 | 34.5 | 2356 | 0.818 |
| 51 | 4.55 | 24.3 | 2494 | 0.800 |
| 52 | 4.64 | 40.0 | 2466 | 0.826 |
| 53 | 5.20 | 63.1 | 2475 | 0.823 |
| 54 | 6.41 | 48.2 | 2377 | 0.792 |
| 55 | 7.59 | 32.1 | 2219 | 0.815 |
| 56 | 6.95 | 43.5 | 2219 | 0.803 |

---

**Table S3:** Heavy metal concentrations in 56 soil samples (mg/kg)

| <b>Sample<br/>no</b> | <b>Zn</b> | <b>Cu</b> | <b>Pb</b> | <b>As</b> | <b>Cr</b> | <b>Ni</b> |
|----------------------|-----------|-----------|-----------|-----------|-----------|-----------|
| 1                    | 97.03     | 33.15     | 40.17     | 17.28     | 98.05     | 29.02     |
| 2                    | 215.3     | 45.92     | 51.47     | 24.53     | 125.91    | 55.03     |
| 3                    | 145.89    | 44.92     | 51.11     | 24.03     | 116.82    | 50.01     |
| 4                    | 152.71    | 44.14     | 57.55     | 16.33     | 110.84    | 46.23     |
| 5                    | 194.20    | 39.29     | 111.43    | 19.34     | 108.32    | 57.63     |
| 6                    | 154.47    | 37.24     | 85.48     | 17.65     | 90.32     | 41.11     |
| 7                    | 173.38    | 74.10     | 51.8      | 23.50     | 198.87    | 68.45     |
| 8                    | 106.47    | 36.32     | 46.53     | 14.07     | 79.32     | 32.21     |
| 9                    | 123.29    | 44.31     | 45.06     | 15.72     | 177.51    | 47.60     |
| 10                   | 64.11     | 18.92     | 29.21     | 9.74      | 62.05     | 29.65     |
| 11                   | 142.68    | 41.89     | 90.00     | 21.57     | 97.41     | 44.79     |
| 12                   | 178.06    | 131.35    | 44.36     | 13.62     | 134.65    | 58.76     |
| 13                   | 210.72    | 57.46     | 72.19     | 23.14     | 152.87    | 57.84     |
| 14                   | 166.31    | 75.46     | 46.33     | 26.76     | 206.45    | 77.80     |
| 15                   | 114.29    | 58.42     | 41.69     | 16.67     | 110.68    | 50.91     |
| 16                   | 270.65    | 37.26     | 55.60     | 30.92     | 129.24    | 60.56     |
| 17                   | 336.52    | 49.28     | 104.36    | 23.36     | 144.63    | 68.69     |
| 18                   | 170.01    | 39.29     | 52.26     | 21.19     | 83.62     | 43.22     |
| 19                   | 158.26    | 26.43     | 66.69     | 41.02     | 92.09     | 33.26     |
| 20                   | 278.72    | 53.54     | 85.79     | 23.56     | 127.6     | 56.57     |
| 21                   | 253.72    | 67.17     | 73.05     | 22.22     | 124.09    | 57.27     |
| 22                   | 183.81    | 36.29     | 67.63     | 21.21     | 79.53     | 42.11     |
| 23                   | 258.24    | 34.99     | 95.23     | 22.69     | 83.72     | 62.33     |
| 24                   | 291.99    | 64.60     | 75.05     | 25.38     | 129.56    | 75.62     |
| 25                   | 377.22    | 36.41     | 115.46    | 24.65     | 120.07    | 56.77     |
| 26                   | 240.01    | 56.38     | 80.544    | 44.51     | 160.37    | 75.24     |
| 27                   | 137.95    | 40.92     | 42.94     | 22.32     | 108.68    | 54.01     |
| 28                   | 112.29    | 34.49     | 47.32     | 18.56     | 96.91     | 42.22     |
| 29                   | 160.82    | 42.19     | 44.89     | 25.91     | 110.75    | 51.94     |
| 30                   | 126.82    | 36.34     | 44.31     | 20.32     | 109.32    | 33.78     |
| 31                   | 371.78    | 72.01     | 74.04     | 49.49     | 292.04    | 97.15     |
| 32                   | 468.55    | 67.52     | 86.28     | 37.21     | 183.31    | 67.95     |
| 33                   | 183.93    | 34.17     | 73.23     | 26.4      | 103.64    | 32.03     |
| 34                   | 137.07    | 33.09     | 41.93     | 15.41     | 92.71     | 43.56     |
| 35                   | 166.04    | 36.19     | 46.61     | 35.77     | 100.15    | 43.21     |
| 36                   | 131.26    | 39.96     | 57.34     | 16.69     | 97.41     | 43.04     |
| 37                   | 70.96     | 25.78     | 21.83     | 11.28     | 72.12     | 52.48     |
| 38                   | 123.18    | 32.79     | 57.33     | 17.99     | 91.13     | 39.87     |
| 39                   | 102.12    | 26.21     | 55.11     | 15.53     | 83.48     | 24.89     |
| 40                   | 94.49     | 26.27     | 42.25     | 15.74     | 89.43     | 25.49     |

|      |        |        |       |       |        |       |
|------|--------|--------|-------|-------|--------|-------|
| 41   | 170.45 | 40.00  | 76.47 | 17.19 | 113.72 | 49.76 |
| 42   | 265.89 | 44.55  | 77.80 | 35.62 | 99.61  | 47.60 |
| 43   | 333.98 | 56.71  | 65.93 | 38.05 | 92.43  | 74.96 |
| 44   | 154.46 | 39.63  | 68.92 | 32.44 | 108.0  | 41.85 |
| 45   | 158.60 | 24.94  | 46.65 | 31.13 | 78.5   | 47.71 |
| 46   | 219.40 | 21.46  | 36.33 | 34.78 | 87.82  | 35.16 |
| 47   | 125.17 | 45.43  | 49.08 | 35.42 | 104.24 | 37.75 |
| 48   | 122.87 | 37.85  | 49.58 | 33.38 | 105.3  | 43.24 |
| 49   | 97.11  | 33.31  | 40.38 | 22.53 | 93.96  | 32.63 |
| 50   | 201.81 | 49.87  | 43.42 | 37.95 | 129.94 | 56.54 |
| 51   | 178.93 | 43.84  | 77.48 | 34.27 | 114.69 | 45.33 |
| 52   | 146.92 | 130.98 | 19.96 | 23.76 | 131.21 | 63.41 |
| 53   | 168.82 | 75.23  | 53.22 | 24.55 | 165.73 | 42.41 |
| 54   | 62.83  | 88.49  | 57.94 | 62.83 | 224.55 | 93.10 |
| 55   | 145.37 | 56.75  | 45.68 | 28.95 | 108.15 | 56.35 |
| 56   | 175.76 | 54.17  | 43.46 | 37.37 | 116.1  | 44.83 |
| Mean | 181    | 47.8   | 59.3  | 25.8  | 119    | 50.8  |
| SD   | 81.7   | 22.0   | 20.9  | 10.1  | 41.2   | 15.6  |

---

**Table S4:** Pollution load index for metals in soil

| <b>Sample no</b> | <b>1</b>  | <b>2</b>  | <b>3</b>  | <b>4</b>  | <b>5</b>  | <b>6</b>  | <b>7</b>  |
|------------------|-----------|-----------|-----------|-----------|-----------|-----------|-----------|
|                  | 0.525     | 0.812     | 0.734     | 0.689     | 0.836     | 0.689     | 0.944     |
| <b>Sample no</b> | <b>8</b>  | <b>9</b>  | <b>10</b> | <b>11</b> | <b>12</b> | <b>13</b> | <b>14</b> |
|                  | 0.527     | 0.691     | 0.357     | 0.743     | 0.848     | 0.917     | 0.97      |
| <b>Sample no</b> | <b>15</b> | <b>16</b> | <b>17</b> | <b>18</b> | <b>19</b> | <b>20</b> | <b>21</b> |
|                  | 0.665     | 1.04      | 1.05      | 0.667     | 0.734     | 0.979     | 0.932     |
| <b>Sample no</b> | <b>22</b> | <b>23</b> | <b>24</b> | <b>25</b> | <b>26</b> | <b>27</b> | <b>28</b> |
|                  | 0.688     | 0.835     | 1.03      | 1.098     | 1.38      | 0.687     | 0.599     |
| <b>Sample no</b> | <b>29</b> | <b>30</b> | <b>31</b> | <b>32</b> | <b>33</b> | <b>34</b> | <b>35</b> |
|                  | 0.729     | 0.608     | 1.56      | 1.42      | 0.715     | 0.582     | 0.724     |
| <b>Sample no</b> | <b>36</b> | <b>37</b> | <b>38</b> | <b>39</b> | <b>40</b> | <b>41</b> | <b>42</b> |
|                  | 0.612     | 0.422     | 0.607     | 0.5       | 0.481     | 0.743     | 0.896     |
| <b>Sample no</b> | <b>43</b> | <b>44</b> | <b>45</b> | <b>46</b> | <b>47</b> | <b>48</b> | <b>49</b> |
|                  | 1.015     | 0.768     | 0.644     | 0.627     | 0.71      | 0.699     | 0.557     |
| <b>Sample no</b> | <b>50</b> | <b>51</b> | <b>52</b> | <b>53</b> | <b>54</b> | <b>55</b> | <b>56</b> |
|                  | 0.86      | 0.843     | 0.795     | 0.854     | 1.06      | 0.777     | 0.803     |



**Table S5:** Heavy metal concentration in 56 potato samples (wet weight mg/kg)

| Sample no | Zn   | Cu    | Pb    | As     | Cr    | Ni    |
|-----------|------|-------|-------|--------|-------|-------|
| 1         | 3.74 | 1.02  | 0.048 | <0.010 | 0.035 | 0.079 |
| 2         | 2.82 | 0.907 | 0.011 | <0.010 | 0.029 | 0.062 |
| 3         | 2.60 | 0.455 | 0.010 | <0.010 | 0.024 | 0.042 |
| 4         | 2.49 | 0.611 | 0.024 | <0.010 | 0.026 | 0.070 |
| 5         | 1.98 | 0.277 | 0.010 | <0.010 | 0.022 | 0.051 |
| 6         | 1.95 | 0.232 | 0.011 | <0.010 | 0.021 | 0.044 |
| 7         | 1.62 | 0.327 | 0.010 | <0.010 | 0.025 | 0.047 |
| 8         | 1.83 | 0.284 | 0.010 | <0.010 | 0.042 | 0.050 |
| 9         | 1.56 | 0.465 | 0.022 | <0.010 | 0.027 | 0.040 |
| 10        | 2.41 | 0.539 | 0.043 | <0.010 | 0.028 | 0.105 |
| 11        | 1.85 | 0.441 | 0.032 | <0.010 | 0.016 | 0.060 |
| 12        | 2.83 | 1.02  | 0.016 | <0.010 | 0.024 | 0.070 |
| 13        | 2.41 | 0.325 | 0.034 | <0.010 | 0.044 | 0.034 |
| 14        | 1.92 | 0.471 | 0.018 | <0.010 | 0.034 | 0.062 |
| 15        | 2.77 | 0.854 | 0.016 | <0.010 | 0.016 | 0.030 |
| 16        | 3.02 | 0.796 | 0.024 | <0.010 | 0.019 | 0.066 |
| 17        | 2.84 | 0.780 | 0.018 | <0.010 | 0.021 | 0.024 |
| 18        | 4.04 | 1.06  | 0.038 | <0.010 | 0.066 | 0.035 |
| 19        | 3.33 | 0.855 | 0.053 | <0.010 | 0.022 | 0.106 |
| 20        | 3.23 | 0.592 | 0.034 | <0.010 | 0.018 | 0.018 |
| 21        | 5.04 | 0.850 | 0.022 | <0.010 | 0.018 | 0.044 |
| 22        | 5.15 | 0.973 | 0.021 | <0.010 | 0.023 | 0.043 |
| 23        | 3.32 | 0.710 | 0.021 | <0.010 | 0.023 | 0.031 |
| 24        | 3.32 | 0.545 | 0.024 | <0.010 | 0.020 | 0.061 |
| 25        | 3.14 | 0.784 | 0.034 | <0.010 | 0.024 | 0.025 |
| 26        | 7.42 | 1.18  | 0.094 | <0.010 | 0.026 | 0.040 |
| 27        | 1.78 | 0.448 | 0.025 | <0.010 | 0.019 | 0.025 |
| 28        | 3.17 | 0.527 | 0.024 | <0.010 | 0.011 | 0.036 |
| 29        | 2.00 | 0.873 | 0.018 | <0.010 | 0.016 | 0.020 |
| 30        | 2.90 | 0.561 | 0.022 | <0.010 | 0.010 | 0.047 |
| 31        | 2.88 | 0.676 | 0.050 | <0.010 | 0.023 | 0.096 |
| 32        | 3.55 | 0.702 | 0.095 | <0.010 | 0.529 | 0.094 |
| 33        | 2.48 | 0.655 | 0.022 | <0.010 | 0.021 | 0.029 |
| 34        | 2.57 | 0.661 | 0.032 | <0.010 | 0.016 | 0.052 |
| 35        | 2.51 | 0.523 | 0.017 | <0.010 | 0.107 | 0.042 |
| 36        | 1.75 | 0.744 | 0.019 | <0.010 | 0.015 | 0.031 |
| 37        | 2.69 | 0.964 | 0.038 | <0.010 | 0.021 | 0.202 |
| 38        | 3.07 | 1.02  | 0.029 | <0.010 | 0.036 | 0.090 |
| 39        | 4.20 | 0.987 | 0.024 | <0.010 | 0.016 | 0.109 |
| 40        | 3.01 | 0.589 | 0.025 | <0.010 | 0.013 | 0.059 |
| 41        | 2.09 | 0.574 | 0.025 | <0.010 | 0.030 | 0.049 |

|      |      |       |       |        |       |       |
|------|------|-------|-------|--------|-------|-------|
| 42   | 2.19 | 0.438 | 0.017 | <0.010 | 0.017 | 0.039 |
| 43   | 2.22 | 0.695 | 0.015 | <0.010 | 0.016 | 0.071 |
| 44   | 1.84 | 0.397 | 0.035 | <0.010 | 0.023 | 0.062 |
| 45   | 2.44 | 0.823 | 0.036 | <0.010 | 0.022 | 0.031 |
| 46   | 2.46 | 0.768 | 0.018 | <0.010 | 0.021 | 0.086 |
| 47   | 2.08 | 0.660 | 0.054 | <0.010 | 0.017 | 0.020 |
| 48   | 2.35 | 0.976 | 0.035 | <0.010 | 0.044 | 0.047 |
| 49   | 1.93 | 0.650 | 0.016 | <0.010 | 0.543 | 0.052 |
| 50   | 3.61 | 1.02  | 0.033 | <0.010 | 0.659 | 0.096 |
| 51   | 2.41 | 0.487 | 0.014 | <0.010 | 0.539 | 0.097 |
| 52   | 1.61 | 0.592 | 0.017 | <0.010 | 0.492 | 0.059 |
| 53   | 1.98 | 0.501 | 0.012 | <0.010 | 0.018 | 0.040 |
| 54   | 1.96 | 0.638 | 0.011 | <0.010 | 0.015 | 0.028 |
| 55   | 1.87 | 0.767 | 0.044 | <0.010 | 0.026 | 0.033 |
| 56   | 2.37 | 0.520 | 0.030 | <0.010 | 0.021 | 0.025 |
| Mean | 2.73 | 0.675 | 0.027 | --     | 0.072 | 0.055 |
| SD   | 1.02 | 0.228 | 0.018 | --     | 0.153 | 0.032 |

---

**Table S6:** Bio-concentration factor for potato (dry weight)/soil system

| Sample<br>no | Zn     | Cu     | Pb     | As     | Cr     | Ni     |
|--------------|--------|--------|--------|--------|--------|--------|
| 1            | 0.1985 | 0.1579 | 0.0062 | <0.001 | 0.0018 | 0.0141 |
| 2            | 0.0680 | 0.1026 | 0.0011 | <0.001 | 0.0012 | 0.0059 |
| 3            | 0.0967 | 0.0549 | 0.0010 | <0.001 | 0.0011 | 0.0045 |
| 4            | 0.1005 | 0.0852 | 0.0025 | <0.001 | 0.0015 | 0.0093 |
| 5            | 0.0527 | 0.0363 | 0.0010 | <0.001 | 0.0011 | 0.0046 |
| 6            | 0.0666 | 0.0328 | 0.0010 | <0.001 | 0.0012 | 0.0057 |
| 7            | 0.0518 | 0.0244 | 0.0010 | <0.001 | 0.0007 | 0.0038 |
| 8            | 0.0100 | 0.0456 | 0.0010 | <0.001 | 0.0031 | 0.0090 |
| 9            | 0.0727 | 0.0602 | 0.0028 | <0.001 | 0.0010 | 0.0049 |
| 10           | 0.1923 | 0.1460 | 0.0075 | <0.001 | 0.0023 | 0.0181 |
| 11           | 0.0812 | 0.0660 | 0.0022 | <0.001 | 0.0010 | 0.0084 |
| 12           | 0.0817 | 0.0397 | 0.0019 | <0.001 | 0.0010 | 0.0061 |
| 13           | 0.0621 | 0.0307 | 0.0025 | <0.001 | 0.0016 | 0.0032 |
| 14           | 0.0600 | 0.0325 | 0.0021 | <0.001 | 0.0010 | 0.0041 |
| 15           | 0.1176 | 0.0709 | 0.0018 | <0.001 | 0.0010 | 0.0029 |
| 16           | 0.0589 | 0.1126 | 0.0023 | <0.001 | 0.0010 | 0.0058 |
| 17           | 0.0410 | 0.0771 | 0.0010 | <0.001 | 0.0010 | 0.0017 |
| 18           | 0.1093 | 0.1245 | 0.0034 | <0.001 | 0.0036 | 0.0037 |
| 19           | 0.0212 | 0.1732 | 0.0043 | <0.001 | 0.0013 | 0.0170 |
| 20           | 0.0116 | 0.0554 | 0.0020 | <0.001 | 0.0007 | 0.0016 |
| 21           | 0.0949 | 0.0604 | 0.0015 | <0.001 | 0.0010 | 0.0037 |
| 22           | 0.1451 | 0.1388 | 0.0016 | <0.001 | 0.0015 | 0.0053 |
| 23           | 0.0689 | 0.1086 | 0.0012 | <0.001 | 0.0014 | 0.0026 |
| 24           | 0.0701 | 0.0521 | 0.0020 | <0.001 | 0.0010 | 0.0050 |
| 25           | 0.0408 | 0.1054 | 0.0014 | <0.001 | 0.0010 | 0.0021 |
| 26           | 0.1583 | 0.1075 | 0.0060 | <0.001 | 0.0010 | 0.0028 |
| 27           | 0.0646 | 0.0549 | 0.0030 | <0.001 | 0.0010 | 0.0023 |
| 28           | 0.1433 | 0.0775 | 0.0026 | <0.001 | 0.0010 | 0.0043 |
| 29           | 0.0642 | 0.1069 | 0.0021 | <0.001 | 0.0010 | 0.0020 |
| 30           | 0.1062 | 0.0717 | 0.0023 | <0.001 | 0.0010 | 0.0064 |
| 31           | 0.0422 | 0.0512 | 0.0037 | <0.001 | 0.0010 | 0.0054 |
| 32           | 0.0422 | 0.0579 | 0.0062 | <0.001 | 0.0161 | 0.0077 |
| 33           | 0.0751 | 0.1073 | 0.0017 | <0.001 | 0.0012 | 0.0050 |
| 34           | 0.1114 | 0.1187 | 0.0045 | <0.001 | 0.0010 | 0.0070 |
| 35           | 0.1010 | 0.0965 | 0.0024 | <0.001 | 0.0071 | 0.0064 |
| 36           | 0.0750 | 0.1047 | 0.0019 | <0.001 | 0.0010 | 0.0041 |
| 37           | 0.1959 | 0.1926 | 0.0090 | <0.001 | 0.0015 | 0.0198 |
| 38           | 0.1278 | 0.1601 | 0.0026 | <0.001 | 0.0020 | 0.0116 |
| 39           | 0.2262 | 0.2071 | 0.0024 | <0.001 | 0.0011 | 0.0241 |
| 40           | 0.1706 | 0.1198 | 0.0032 | <0.001 | 0.0010 | 0.0124 |

|      |        |        |        |        |        |        |
|------|--------|--------|--------|--------|--------|--------|
| 41   | 0.0674 | 0.0789 | 0.0018 | <0.001 | 0.0014 | 0.0054 |
| 42   | 0.0449 | 0.0537 | 0.0012 | <0.001 | 0.0010 | 0.0044 |
| 43   | 0.0334 | 0.0618 | 0.0011 | <0.001 | 0.0010 | 0.0048 |
| 44   | 0.0653 | 0.0550 | 0.0028 | <0.001 | 0.0012 | 0.0081 |
| 45   | 0.0731 | 0.1570 | 0.0037 | <0.001 | 0.0013 | 0.0031 |
| 46   | 0.0629 | 0.2012 | 0.0028 | <0.001 | 0.0013 | 0.0138 |
| 47   | 0.0749 | 0.0657 | 0.0050 | <0.001 | 0.0010 | 0.0024 |
| 48   | 0.0881 | 0.1190 | 0.0032 | <0.001 | 0.0019 | 0.0050 |
| 49   | 0.1113 | 0.1092 | 0.0022 | <0.001 | 0.0323 | 0.0089 |
| 50   | 0.0981 | 0.1122 | 0.0041 | <0.001 | 0.0279 | 0.0093 |
| 51   | 0.0673 | 0.0554 | 0.0009 | <0.001 | 0.0234 | 0.0107 |
| 52   | 0.0626 | 0.0259 | 0.0049 | <0.001 | 0.0215 | 0.0054 |
| 53   | 0.0662 | 0.0375 | 0.0013 | <0.001 | 0.0010 | 0.0053 |
| 54   | 0.1500 | 0.0347 | 0.0010 | <0.001 | 0.0010 | 0.0014 |
| 55   | 0.0697 | 0.0731 | 0.0052 | <0.001 | 0.0013 | 0.0032 |
| 56   | 0.0685 | 0.0488 | 0.0035 | <0.001 | 0.0010 | 0.0028 |
| Mean | 0.087  | 0.088  | 0.0028 | <0.001 | 0.0034 | 0.0066 |

---
